# Supplementary material for: Synthesis, structural and chemical properties of iron oxide–silica aerogelsElectronic supplementary information (ESI) available: cumulative pore volumes and t-plots of the calcined aerogels prepared by different sol–gel methods, and of aerogels with different iron loadings. See http://www.rsc.org/suppdata/jm/b1/b108120a/
Source: Royal Society of Chemistry journal article supplement (doi:10.1039/b108120a), 2002-02-04
Supplement: b108120a.doc [file b108120a.doc]

Electronic Supplementary Information - Figure S1: Cumulative pore volume and t-plots of the calcined aerogels prepared by different sol-gel methods (top), and of aerogels with different iron loading (bottom).
